# Supplementary material for: Characterization of First-Time Hospitalizations in Patients With Newly Diagnosed Pulmonary Arterial Hypertension in the REVEAL Registry
Source: PubMed Central journal article supplement — Chest. 2014 Jun 5;146(5):1263–73. doi: 10.1378/chest.14-0193 (PMC4219341; doi:10.1378/chest.14-0193), 2014-06-05
Supplement: chest_146_5_1263_ds01.pdf [file chest_146_5_1263_ds01.pdf]

## Characterization of First-Time Hospitalizations in Patients With Newly Diagnosed Pulmonary Arterial Hypertension in the REVEAL Registry

*Charles D. Burger, MD; Pamela K. Long, RN; Monarch R. Shah, MS; Michael D. McGoon, MD; Dave P. Miller, MS; Alain J. Romero, PharmD, PhD; Wade W. Benton, PharmD; Robert E. Safford, MD, PhD*

CHEST 2014; 146(5):1263-1273

**e-Table 1. IRB Committee and project approval number list.**

| Study Center                                                       | Name of IRB                                       | Approval Number |
|--------------------------------------------------------------------|---------------------------------------------------|-----------------|
| Intermountain Medical Center                                       | Intermountain Healthcare Urban Central Region IRB | 1009009         |
| Allegheny General Hospital                                         | ASRI- WPAHS Institutional Review Board            | RC-4088         |
| University of Pittsburgh Medical Center Cardiovascular Institute   | WIRB                                              | 1077291         |
| Oregon Health and Science University (up to 06Jun2008)             | Oregon Health and Science Univeristy IRB          | IRB00002436     |
| Legacy Good Samaritan Hospital and Health Center (after 06Jun2008) | WIRB                                              | 1099977         |
| Inova Fairfax Hospital                                             | WIRB                                              | 1079519         |
| Kalamazoo Center for Medical Studies                               | Spectrum Health IRB                               | 2006-108        |
| University of Colorado Health Sciences Center                      | Colorado Multiple Institutional Review Board      | 06-0235         |
| Mayo Clinic Rochester                                              | Mayo Clinic Office for Human Research IRB         | 06-002271       |

*Online supplements are not copyedited prior to posting.*



|                                                              |                                                                                    |                 |
|--------------------------------------------------------------|------------------------------------------------------------------------------------|-----------------|
| Baylor College of Medicine                                   | Institutional Review Board for Baylor College of Medicine and Affiliated Hospitals | H-19065         |
| Midwest Heart Specialists                                    | WIRB                                                                               | 1078500         |
| Georgia Health Sciences University                           | Human Assurance Committee                                                          | 06-05-288       |
| Aurora St. Luke's Medical Center                             | Aurora IRB                                                                         | L-06-74E        |
| University of Alabama at Birmingham                          | WIRB                                                                               | 1078385         |
| The University of Texas Health Science Center at San Antonio | The University of Texas Health Science Center IRB                                  | HSC20070383H    |
| University of Iowa Hospital and Clinics                      | Human Subjects Office/ Institutional Review Board/ Hawk IRB                        | 200603714       |
| University of Colorado School of Medicine                    | Colorado Multiple Institutional Review Board                                       | 06-0500         |
| University of California, San Diego                          | UCSD Human Research Protections Programs                                           | 060466          |
| Ochsner Clinic Foundation                                    | Ochsner Clinic Foundation IRB                                                      | 2006.085.B      |
| Rhode Island Hospital                                        | Lifespan Rhode Island IRB                                                          | 4075-06         |
| University of Maryland                                       | University of Maryland IRB                                                         | H-28017         |
| Temple University                                            | Temple University IRB                                                              | 10127           |
| Brigham and Women's Hospital                                 | Brigham Women's Hospital IRB                                                       | 2006-P-000884/1 |
| Mayo Clinic Florida                                          | Mayo Clinic Office for Human Research IRB                                          | 06-002271       |
| University of California San Francisco                       | Human Research Protection Program                                                  | 10-00632        |

*Online supplements are not copyedited prior to posting.*



|                                                |                                                                    |              |
|------------------------------------------------|--------------------------------------------------------------------|--------------|
| North Shore- Long Island Jewish Health Systems | BRANY IRB                                                          | 06-02-83-03  |
| VA Greater Los Angeles Healthcare System       | VA Greater Los Angeles Healthcare Systems IRB                      | 2006-060912  |
| University of Rochester                        | University of Rochester Research Subjects Review Board             | RSRB00014458 |
| Washington University in St. Louis             | Washington University Human Research Protection Office             | 06-0753      |
| Suncoast Lung Center                           | WIRB                                                               | 1080843      |
| Wayne State University                         | Wayne State University IRB                                         | 0606003802   |
| Duke University Medical Center                 | Duke University Health System IRB                                  | Pro00008240  |
| University of Pennsylvania                     | University of Pennsylvania IRB                                     | 804760       |
| University of Arizona                          | University of Arizona Human Subjects Protection Program            | BSC B06.231  |
| University of Minnesota Medical Center         | University of Minnesota Research Subjects' Protection Programs IRB | 0607M89066   |
| Boston University Medical Center               | WIRB                                                               | 1081775      |
| Nationwide Children's Hospital                 | Nationwide Children's Hospital IRB                                 | IRB10-00475  |
| Johns Hopkins University                       | WIRB                                                               | 1078595      |
| Cleveland Clinic                               | Cleveland Clinic Foundation IRB                                    | 06-259       |
| Columbia University Medical Center             | Columbia University Medical Center IRB                             | AAAC0789     |
| University of Chicago                          | The University of Chicago AURA IRB                                 | 14917B       |
| Medical University of South Carolina           | The Medical University of South Carolina IRB for Human Research    | 16617        |

*Online supplements are not copyedited prior to posting.*



|                                            |                                                                                    |                 |
|--------------------------------------------|------------------------------------------------------------------------------------|-----------------|
| Texas Children's Hospital                  | Institutional Review Board for Baylor College of Medicine and Affiliated Hospitals | H-19569         |
| Tufts- New England Medical Center Hospital | Tufts Health Sciences Campus Institutional Review Board                            | 7929            |
| Lexington Pulmonary and Critical Care      | WIRB                                                                               | 1085453         |
| Stanford University Medical Center         | Stanford University IRB                                                            | 96981 / 5359    |
| Monroe Carell Jr. Children's Hospital      | Vanderbilt University IRB                                                          | 061152          |
| Vanderbilt Medical Center                  | Vanderbilt University IRB                                                          | 070020          |
| Ohio State University                      | Ohio State University Biomedical Sciences IRB                                      | 2006H0177       |
| Kentuckiana Pulmonary Associates           | WIRB                                                                               | 1086454         |
| UCLA                                       | UCLA Medical IRB                                                                   | 06-06-118-01    |
| University Hospitals of Cleveland          | University Hospitals Case Medical Center (UHCMC) IRB for Human Investigation       | 07-06-28        |
| Beth Israel Medical Center                 | Beth Israel Medical Center IRB                                                     | 013-08 / 132-10 |
| Harbor UCLA Medical Center                 | Los Angeles Biomedical Research Institution                                        | 12722-01        |
| Seattle Children's Hospital                | Children's Hospital and Regional Medical Center Seattle, Washington IRB            | 06-0822         |
| Virginia Commonwealth University           | WIRB                                                                               | 1090150         |
| University of Florida                      | WIRB                                                                               | 1097909         |

*Online supplements are not copyedited prior to posting.*

**e-Table 2.** No. (%) of first hospitalizations, by year post-enrollment.

|                                            | <b>PAH related</b><br><b>(n = 257)</b> | <b>PAH unrelated</b><br><b>(n = 214)</b> |
|--------------------------------------------|----------------------------------------|------------------------------------------|
| First year post-enrollment, n (%)          | 145 (56.4)                             | 104 (48.6)                               |
| Second year post-enrollment, n (%)         | 56 (21.8)                              | 40 (18.7)                                |
| Third year post-enrollment or later, n (%) | 56 (21.8)                              | 70 (32.7)                                |

PAH, pulmonary arterial hypertension.

*Online supplements are not copyedited prior to posting.*

**e-Figure 1.** Timing and type of PAH-related hospitalizations. (A) Proportion of intravenous line-related, right heart-related, or not specified hospitalizations occurring in each time period. (B) Proportion of PAH-related hospitalizations occurring in each time period for intravenous line-related, right heart-related, and not specified causes. Intravenous line-related hospitalizations included hospitalizations for initial intravenous line insertion, intravenous line conversion, placement or removal of a central venous catheter, right-heart catheterization, and catheter infection. Right heart-related hospitalizations included hospitalizations for congestive heart failure, syncope, PH medication-related adverse event, organ transplant, atrial septostomy, and escalation of PAH-related treatment. Not specified causes included all PAH-related but otherwise uncharacterized reasons.

**e-Figure 1A.**

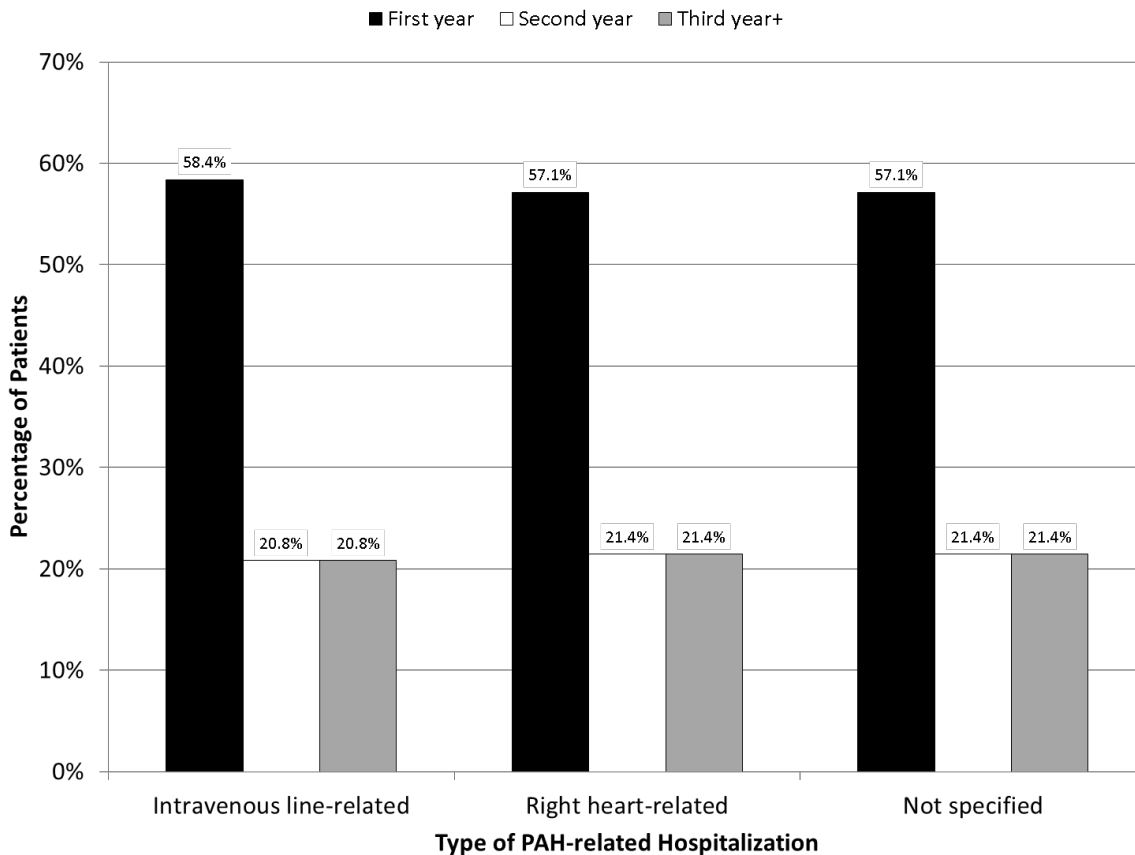

*Online supplements are not copyedited prior to posting.*

e-Figure 1B.

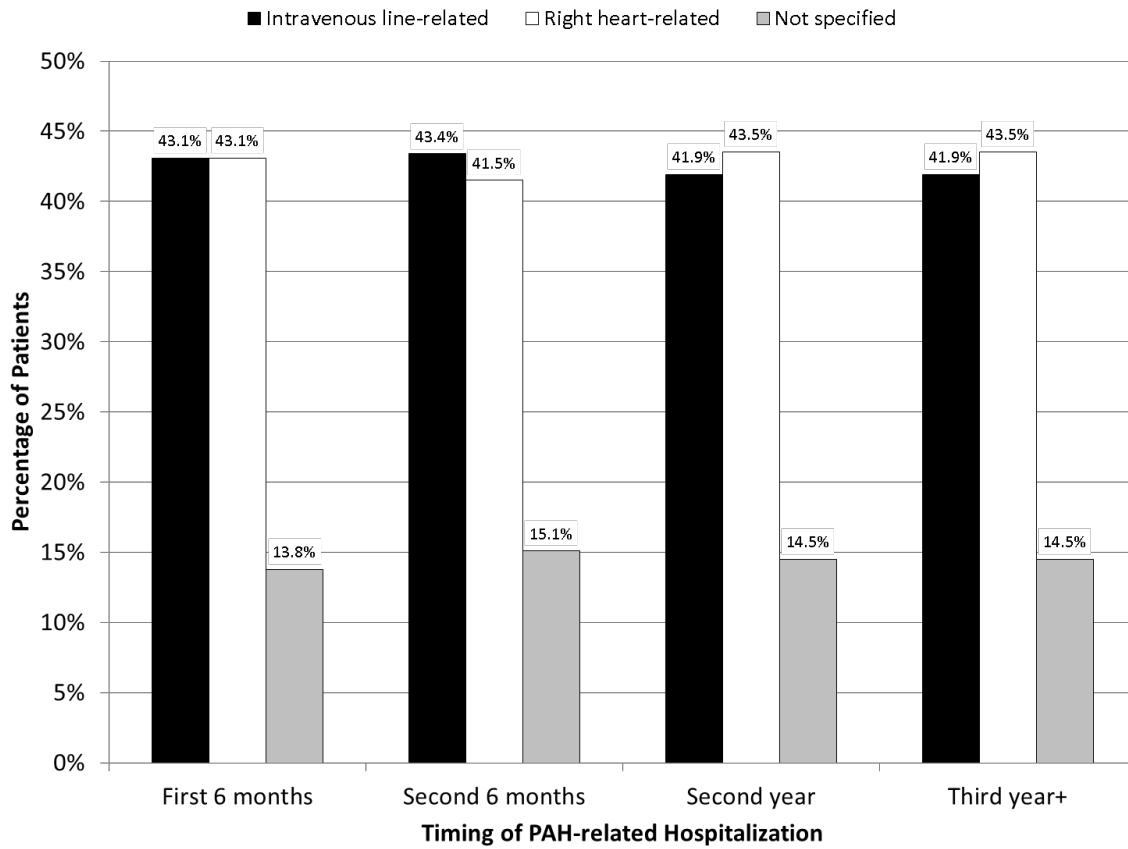

Online supplements are not copyedited prior to posting.

**e-Figure 2.** Distribution of (A) intravenous line-related reasons and (B) right heart-related reasons for first-time hospitalization by time of event, as a proportion of the total number of reasons for hospitalization. Patients could have had more than one reason for hospitalization: in the first 6 months, 116 reasons were recorded for 100 patient admissions; in the second 6 months, 53 reasons were recorded for 45 patient admissions; in the second year, 62 reasons were recorded for 56 patient admissions; and in the third year or later, 62 reasons were recorded for 56 patient admissions. PAH-related, but otherwise uncharacterized, reasons for hospitalization are not shown, but they are counted in the total number of reasons for hospitalization. Uncharacterized PAH-related reasons were cited in 16 (13.8%) hospitalizations in the first 6 months, in 8 (15.1%) hospitalizations in the second 6 months, 9 (14.5%) hospitalizations in the second year, and 9 (14.5%) hospitalizations in the third year or later.

**e-Figure 2A.**

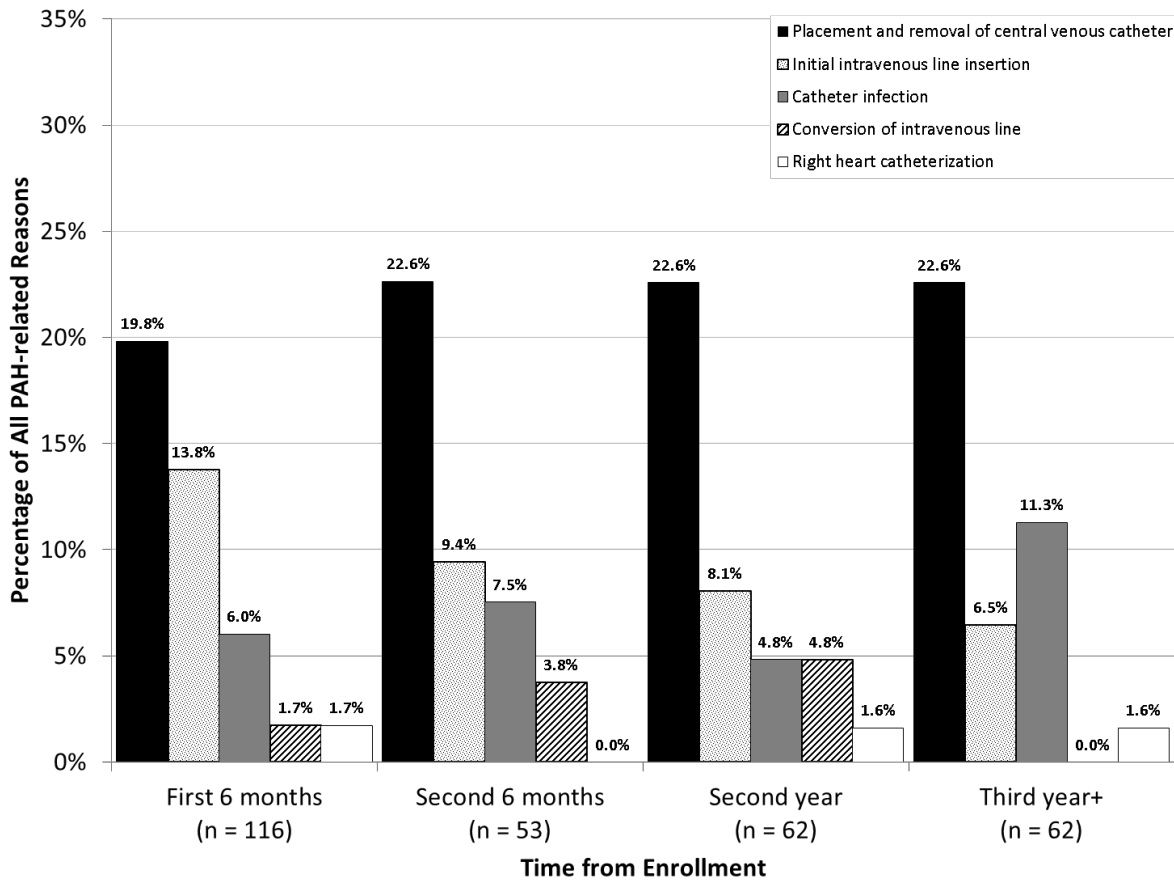

*Online supplements are not copyedited prior to posting.*



**e-Figure 2B.**

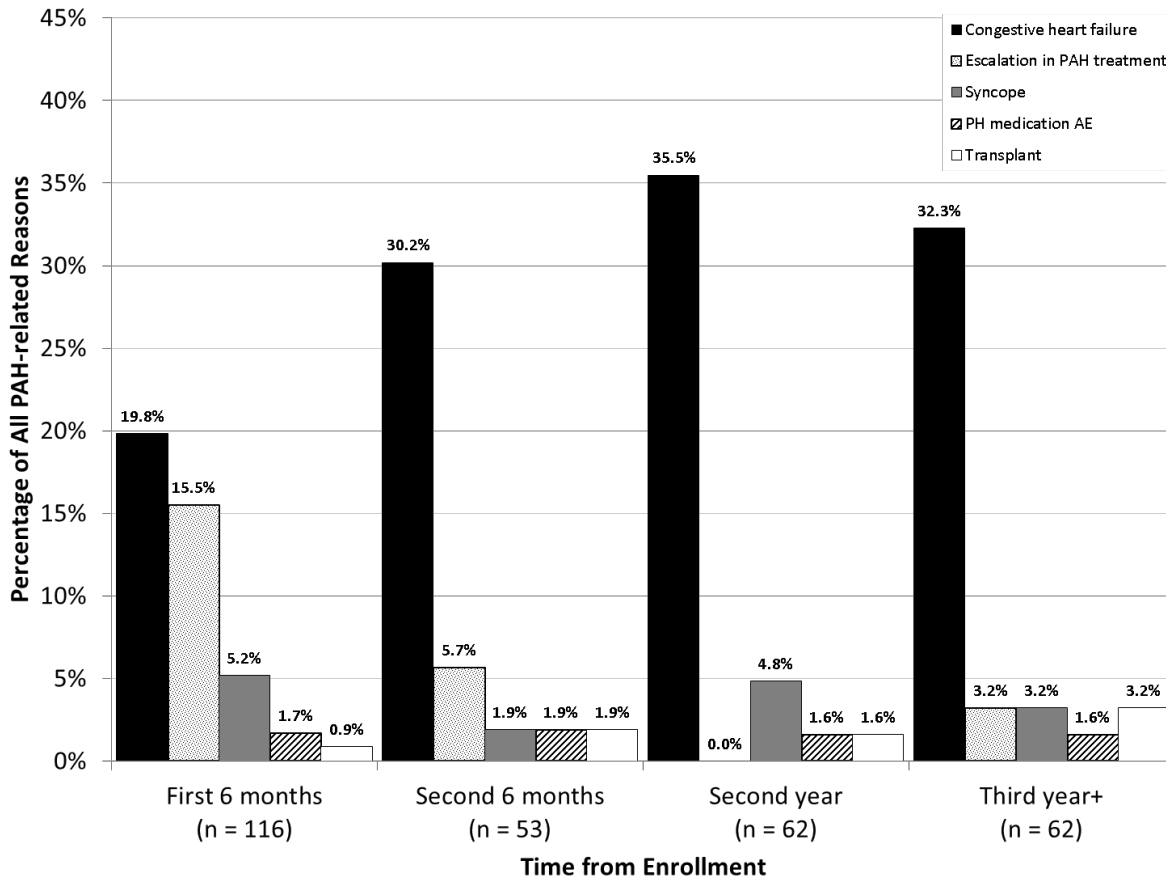

*Online supplements are not copyedited prior to posting.*
